# Supplementary material for: A Faunistic Revision of Longnose Skates of the Genus Dipturus (Rajiformes: Rajidae) from the Southern Southwestern Atlantic Ocean, Based on Morphological and Molecular Evidence
Source: MDPI journal article supplement (doi:10.3390/d16030146), 2024-02-25
Supplement: s1 [file s1]

Table S1. COI sequences of analyzed specimens used for phylogenetic analyses, indicating the original classification, geographic sample provenance, and references.

| Sequence COI                                      | Original classification | Geographic sample provenance | Reference     |
|---------------------------------------------------|-------------------------|------------------------------|---------------|
| EH0116 L8 <i>Zearaja flavirostris</i>             | <i>Z. flavirostris</i>  | Argentina                    | [33]          |
| Zchil-4 <i>Zearaja brevicaudata</i>               | <i>Z. brevicaudata</i>  | Argentina                    | Present study |
| FARG014-06 <i>Zearaja brevicaudata</i> EU074404.1 | <i>Z. brevicaudata</i>  | Argentina                    | [45]          |
| EH0612 <i>Zearaja flavirostris</i> KY356838.1     | <i>Z. flavirostris</i>  | Argentina                    | [33]          |
| EH0413-9 <i>Zearaja flavirostris</i> KY356836.1   | <i>Z. flavirostris</i>  | Argentina                    | [33]          |
| EH0413-8 <i>Zearaja flavirostris</i> KY356835.1   | <i>Z. flavirostris</i>  | Argentina                    | [33]          |
| EH0413-6 <i>Zearaja flavirostris</i> KY356833.1   | <i>Z. flavirostris</i>  | Argentina                    | [33]          |
| EH0413-4 <i>Zearaja flavirostris</i> KY356831.1   | <i>Z. flavirostris</i>  | Argentina                    | [33]          |
| EH0413-3 <i>Zearaja flavirostris</i> KY356830.1   | <i>Z. flavirostris</i>  | Argentina                    | [33]          |
| EH0413-2 <i>Zearaja flavirostris</i> KY356829.1   | <i>Z. flavirostris</i>  | Argentina                    | [33]          |
| EH0312-4 <i>Zearaja flavirostris</i> KY356825.1   | <i>Z. flavirostris</i>  | Argentina                    | [33]          |
| EH0111-227 <i>Zearaja flavirostris</i> KY356819.1 | <i>Z. flavirostris</i>  | Argentina                    | [33]          |
| Zchil-5 <i>Zearaja brevicaudata</i>               | <i>Z. brevicaudata</i>  | Argentina                    | Present study |
| FARG569-09 <i>Zearaja brevicaudata</i> MK813400.1 | <i>Z. brevicaudata</i>  | Argentina                    | [7]           |
| FARG568-09 <i>Zearaja brevicaudata</i> MK813396.1 | <i>Z. brevicaudata</i>  | Argentina                    | [7]           |
| FARG567-09 <i>Zearaja brevicaudata</i> MK813402.1 | <i>Z. brevicaudata</i>  | Argentina                    | [7]           |
| FARG016-06 <i>Zearaja brevicaudata</i> EU074400.1 | <i>Z. brevicaudata</i>  | Argentina                    | [7]           |
| Zchil-2 <i>Zearaja brevicaudata</i>               | <i>Z. brevicaudata</i>  | Argentina                    | Present study |
| Zchil <i>Zearaja brevicaudata</i>                 | <i>Z. brevicaudata</i>  | Argentina                    | Present study |
| EH0613-16 <i>Zearaja flavirostris</i>             | <i>Z. flavirostris</i>  | Argentina                    | [33]          |
| EH0413- <i>Zearaja flavirostris</i> KY356832.1    | <i>Z. flavirostris</i>  | Argentina                    | [33]          |
| EH0413-10 <i>Zearaja flavirostris</i> KY356837.1  | <i>Z. flavirostris</i>  | Argentina                    | [33]          |
| EH0111-222 <i>Zearaja flavirostris</i> KY356818.1 | <i>Z. flavirostris</i>  | Argentina                    | [33]          |
| KF648508 <i>Zearaja chilensis</i>                 | <i>D. lamillai</i>      | Not specified                | [26]          |
| EH0312-5 <i>Zearaja flavirostris</i> KY356826.1   | <i>Z. flavirostris</i>  | Argentina                    | [33]          |
| EH0309-104 <i>Zearaja flavirostris</i> KY356820.1 | <i>Z. flavirostris</i>  | Argentina                    | [33]          |
| FARG018-06 <i>Zearaja brevicaudata</i> EU074403.1 | <i>Z. brevicaudata</i>  | Argentina                    | [45]          |

|                                                                            |                         |               |               |
|----------------------------------------------------------------------------|-------------------------|---------------|---------------|
| FARG015-06 <i>Zearaja brevicaudata</i> EU074402.1                          | <i>Z. brevicaudata</i>  | Argentina     | [45]          |
| EH0312-3 <i>Zearaja flavirostris</i> KY356824.1                            | <i>Z. flavirostris</i>  | Argentina     | [33]          |
| EH0312-1 <i>Zearaja flavirostris</i> KY356822.1                            | <i>Z. flavirostris</i>  | Argentina     | [33]          |
| EH0413-1 <i>Zearaja flavirostris</i> KY356837.1                            | <i>Z. flavirostris</i>  | Argentina     | [33]          |
| EH0312-2 <i>Zearaja flavirostris</i> KY356823.1                            | <i>Z. flavirostris</i>  | Argentina     | [33]          |
| EH0312-6 <i>Zearaja flavirostris</i> KY356827.1                            | <i>Z. flavirostris</i>  | Argentina     | [33]          |
| Zchil-1 <i>Zearaja brevicaudata</i>                                        | <i>Z. brevicaudata</i>  | Argentina     | Present study |
| FARG338-07 <i>Zearaja brevicaudata</i> EU074401.1                          | <i>Z. brevicaudata</i>  | Uruguay       | [45]          |
| EH0413-7 <i>Zearaja flavirostris</i> KY356834.1                            | <i>Z. flavirostris</i>  | Argentina     | [33]          |
| KR152643.1 <i>Dipturus trachyderma</i> mitochondrion complete genome       | <i>D. trachyderma</i>   | Chile         | [10]          |
| VictI <i>Dipturus trachyderma</i>                                          | <i>D. trachyderma</i>   | Argentina     | Present study |
| EH0117L6-2 <i>Dipturus trachyderma</i>                                     | <i>D. trachyderma</i>   | Argentina     | Present study |
| KF962934.1 <i>Dipturus argentinensis</i> mitochondrion complete genome COI | <i>D. argentinensis</i> | Not specified | [24]          |
| EU074405.1 <i>Dipturus argentinensis</i> isolate FARG019-06                | <i>D. argentinensis</i> | Argentina     | [45]          |
| EU074406.1 <i>Dipturus argentinensis</i> isolate FARG320-07                | <i>D. argentinensis</i> | Argentina     | [45]          |
| EU074409.1 <i>Dipturus argentinensis</i> isolate FARG020-06                | <i>D. argentinensis</i> | Argentina     | [45]          |
| KU737841.1 <i>Dipturus argentinensis</i> voucher SWFSC:DCG1                | <i>D. argentinensis</i> | Chile         | Unpublished.  |
| MK982884.1 <i>Dipturus argentinensis</i> isolate DIPSP-02-2017             | <i>D. argentinensis</i> | Chile         | Unpublished.  |
| EH0117 L3-1 <i>Dipturus argentinensis</i>                                  | <i>D. argentinensis</i> | Argentina     | Present study |
| EH0117 L6-2 <i>Dipturus argentinensis</i>                                  | <i>D. argentinensis</i> | Argentina     | Present study |
| EH0117 L13-3 <i>Dipturus argentinensis</i>                                 | <i>D. argentinensis</i> | Argentina     | Present study |
| EH0113 L9 <i>Dipturus argentinensis</i>                                    | <i>D. argentinensis</i> | Argentina     | Present study |
| EH0113 L13 <i>Dipturus argentinensis</i>                                   | <i>D. argentinensis</i> | Argentina     | Present study |
| FNZ127-06 <i>Zearaja nasuta</i> COI-5P                                     | <i>Z. nasuta</i>        | New Zealand   | [41]          |
| FNZ413-06 <i>Zearaja nasuta</i> COI-5P                                     | <i>Z. nasuta</i>        | New Zealand   | [45]          |
| FNZ415-06 <i>Zearaja nasuta</i> COI-5P                                     | <i>Z. nasuta</i>        | New Zealand   | [45]          |
| FNZA617-08 <i>Zearaja nasuta</i> COI-5P I AAB4430                          | <i>Z. nasuta</i>        | New Zealand   | [45]          |
| FNZA619-08 <i>Zearaja nasuta</i> COI-5P                                    | <i>Z. nasuta</i>        | New Zealand   | [45]          |
| GBMNA14225-19 <i>Zearaja nasuta</i> COI-5P MF278960                        | <i>Z. nasuta</i>        | New Zealand   | [46]          |
| GBMNA18583-19 <i>Zearaja nasuta</i> COI-5P NC 037961                       | <i>Z. nasuta</i>        | New Zealand   | [46]          |

|                                          |                          |               |                                      |
|------------------------------------------|--------------------------|---------------|--------------------------------------|
| FNZ417-06 <i>Zearaja nasuta</i> COI-5P   | <i>Z. nasuta</i>         | New Zealand   | [47]                                 |
| IRREK464-08 <i>Zearaja nasuta</i> COI-5P | <i>Z. nasuta</i>         | New Zealand   | [45]                                 |
| FNZ322-06 <i>Zearaja nasuta</i> COI-5P   | <i>Z. nasuta</i>         | New Zealand   | [45]                                 |
| JN602438.1 <i>Zearaja nasuta</i>         | <i>Z. nasuta</i>         | Not specified | [47]                                 |
| FNZA616-08 <i>Zearaja nasuta</i> COI-5P  | <i>Z. nasuta</i>         | New Zealand   | [46]                                 |
| NC 037961 <i>Zearaja nasuta</i> COI-5P   | <i>Z. nasuta</i>         | New Zealand   | [46]                                 |
| MF278960 <i>Zearaja nasuta</i> COI-5P    | <i>Z. nasuta</i>         | New Zealand   | [46]                                 |
| KJ913073 <i>Zearaja chilensis</i>        | <i>Z. chilensis</i>      | Chile         | [10]                                 |
| FCHIL126-06 <i>Zearaja chilensis</i>     | <i>Z. chilensis</i>      | Chile         | BOLD Databases. BIN ID BOLD: AAB5857 |
| FCHIL139-06 <i>Zearaja chilensis</i>     | <i>Z. chilensis</i>      | Chile         | BOLD Databases. BIN ID: AAB5857      |
| FCHIL136-06 <i>Zearaja chilensis</i>     | <i>Z. chilensis</i>      | Chile         | BOLD Databases. BIN ID: AAB5857      |
| FCHIL135-06 <i>Zearaja chilensis</i>     | <i>Z. chilensis</i>      | Chile         | BOLD Databases. BIN ID: AAB5857      |
| FCHIL133-06 <i>Zearaja chilensis</i>     | <i>Z. chilensis</i>      | Chile         | BOLD Databases. BIN ID: AAB5857      |
| FCHIL130-06 <i>Zearaja chilensis</i>     | <i>Z. chilensis</i>      | Chile         | BOLD Databases. BIN ID: AAB5857      |
| FCHIL129-06 <i>Zearaja chilensis</i>     | <i>Z. chilensis</i>      | Chile         | BOLD Databases. BIN ID: AAB5857      |
| FCHIL128-06 <i>Zearaja chilensis</i>     | <i>Z. chilensis</i>      | Chile         | BOLD Databases. BIN ID: AAB5857      |
| FCHIL127-06 <i>Zearaja chilensis</i>     | <i>Z. chilensis</i>      | Chile         | BOLD Databases. BIN ID: AAB5857      |
| EU398766 <i>Dipturus gudgeri</i>         | <i>D. gudgeri</i>        | Tasmania      | [48]                                 |
| GU805787 <i>Dipturus laevis</i>          | <i>D. laevis</i>         | Antartida     | Unpublished                          |
| EU339345 <i>Dipturus kwangtungensis</i>  | <i>D. kwangtungensis</i> | Not specified | Unpublished                          |

45. Mabragaña, E.; Diaz de Astarloa, J.; Hanner, R.; Zhang, J.; Gonzalez Castro, M. DNA barcoding identifies argentine fishes from marine and brackish waters. *PLoS ONE*. **2011**, *6*, e28655.
46. Vargas Caro, C.A. Skate-Ing on Thin Ice: Molecular Ecology of Longnose Skates in the Southeast Pacific Ocean. Ph.D. Thesis, University of Queensland, Brisbane, Australia, 2017.
47. Lago, F.C.; Vieites, J.M.; Espiñeira, M. Development of a FINS- based method for the identification of skates species of commercial interest. *Food Control* **2012**, *24*, 38–43.
48. Ward, R.; Holmes, B.; Last, P. DNA barcoding Australasian chondrichthyans: Results and potential uses in conservation. *Mar. Freshw. Res.* **2008**, *59*, 57–71.

Table S2. NADH2 sequences of analyzed specimens used for phylogenetic analyses, indicating the original classification, geographic sample provenance, and references.

| Sequence NADH2                                          | Original classification | Geographic sample provenance | Reference     |
|---------------------------------------------------------|-------------------------|------------------------------|---------------|
| EH0413-4 NADH2 <i>Zearaja flavirostris</i>              | <i>Z. flavirostris</i>  | Argentina                    | Present study |
| EH0111-222 NADH2 <i>Zearaja flavirostris</i>            | <i>Z. flavirostris</i>  | Argentina                    | Present study |
| EH0413-1 NADH2 <i>Zearaja flavirostris</i>              | <i>Z. flavirostris</i>  | Argentina                    | Present study |
| EH0413-2 NADH2 <i>Zearaja flavirostris</i>              | <i>Z. flavirostris</i>  | Argentina                    | Present study |
| EH0413-5 NADH2 <i>Zearaja flavirostris</i>              | <i>Z. flavirostris</i>  | Argentina                    | Present study |
| EH0413-6 NADH2 <i>Zearaja flavirostris</i>              | <i>Z. flavirostris</i>  | Argentina                    | Present study |
| EH0413-9 NADH2 <i>Zearaja flavirostris</i>              | <i>Z. flavirostris</i>  | Argentina                    | Present study |
| EH0413-10 NADH2 <i>Zearaja flavirostris</i>             | <i>Z. flavirostris</i>  | Argentina                    | Present study |
| MK613973.1 <i>Dipturus lamillai</i> isolate FA-10 NADH2 | <i>D. lamillai</i>      | Falkland Islands (Malvinas)  | [5]           |
| MK613972.1 <i>Dipturus lamillai</i> isolate FA-9 NADH2  | <i>D. lamillai</i>      | Falkland Islands (Malvinas)  | [5]           |
| MK613971.1 <i>Dipturus lamillai</i> isolate FA-8 NADH2  | <i>D. lamillai</i>      | Falkland Islands (Malvinas)  | [5]           |
| MK613969.1 <i>Dipturus lamillai</i> isolate FA-1 NADH2  | <i>D. lamillai</i>      | Falkland Islands (Malvinas)  | [5]           |
| MK613966.1 <i>Dipturus lamillai</i> isolate FA-46 NADH2 | <i>D. lamillai</i>      | Falkland Islands (Malvinas)  | [5]           |
| JQ518902.1 <i>Dipturus flavirostris</i> GN2361(NADH2)   | <i>Z. flavirostris</i>  | Falkland Islands (Malvinas)  | [6]           |
| EH0111-227 NADH2 <i>Zearaja flavirostris</i>            | <i>Z. flavirostris</i>  | Argentina                    | Present study |
| EH0312-1 NADH2 <i>Zearaja flavirostris</i>              | <i>Z. flavirostris</i>  | Argentina                    | Present study |
| EH0312-3 NADH2 <i>Zearaja flavirostris</i>              | <i>Z. flavirostris</i>  | Argentina                    | Present study |
| EH0413-8 NADH2 <i>Zearaja flavirostris</i>              | <i>Z. flavirostris</i>  | Argentina                    | Present study |
| EH0312-2 NADH2 <i>Zearaja flavirostris</i>              | <i>Z. flavirostris</i>  | Argentina                    | Present study |
| EH0312-4 NADH2 <i>Zearaja flavirostris</i>              | <i>Z. flavirostris</i>  | Argentina                    | Present study |
| EH0312-5 NADH2 <i>Zearaja flavirostris</i>              | <i>Z. flavirostris</i>  | Argentina                    | Present study |
| KF648508.1 <i>Zearaja chilensis</i> mit compl genome    | <i>Z. chilensis</i>     | Not specified                | [26]          |
| EH0312-6 NADH2 <i>Zearaja flavirostris</i>              | <i>Z. flavirostris</i>  | Argentina                    | Present study |
| EH0413-7 NADH2 <i>Zearaja flavirostris</i>              | <i>Z. flavirostris</i>  | Argentina                    | Present study |
| MK613970.1 <i>Dipturus lamillai</i> isolate FA-3 NADH2  | <i>D. lamillai</i>      | Falkland Islands (Malvinas)  | [5]           |
| MK613968.1 <i>Dipturus lamillai</i> isolate FA-47 NADH2 | <i>D. lamillai</i>      | Falkland Islands (Malvinas)  | [5]           |
| MK613967.1 <i>Dipturus lamillai</i> isolate FA-39 NADH2 | <i>D. lamillai</i>      | Falkland Islands (Malvinas)  | [5]           |

|                                                                |                         |                             |               |
|----------------------------------------------------------------|-------------------------|-----------------------------|---------------|
| EH0113 L13 <i>Dipturus argentinensis</i>                       | <i>D. argentinensis</i> | Argentina                   | Present study |
| EH0117 L3-1 NADH2 <i>Dipturus argentinensis</i>                | <i>D. argentinensis</i> | Argentina                   | Present study |
| EH0117 L13-3 NADH2 <i>Dipturus argentinensis</i>               | <i>D. argentinensis</i> | Argentina                   | Present study |
| DT7-16 NADH2 <i>Dipturus trachyderma</i>                       | <i>D. trachyderma</i>   | Argentina                   | Present study |
| EH0117 L6 NADH2 <i>Dipturus trachyderma</i>                    | <i>D. trachyderma</i>   | Argentina                   | Present study |
| EH0118 NADH2 <i>Dipturus trachyderma</i>                       | <i>D. trachyderma</i>   | Argentina                   | Present study |
| JQ400131.1 <i>Dipturus trachyderma</i> (NADH2)                 | <i>D. trachyderma</i>   | Chile                       | [6]           |
| JQ518866.1 <i>Dipturus leptocauda</i> bio-mat GN2397 (NADH2)   | <i>D. leptocaudus</i>   | Falkland Islands (Malvinas) | [6]           |
| VicI NADH2 <i>Dipturus trachyderma</i>                         | <i>D. trachyderma</i>   | Argentina                   | Present study |
| KR152643.1 <i>Dipturus trachyderma</i> mit compl genome        | <i>D. trachyderma</i>   | Chile                       | [10]          |
| KF962934.1 <i>Dipturus argentinensis</i> mit compl genome      | <i>D. argentinensis</i> | Not specified               | [26]          |
| EH0113 L9 NADH2 <i>Dipturus argentinensis</i>                  | <i>D. argentinensis</i> | Argentina                   | Present study |
| EH0117 L6-2 NADH2 <i>Dipturus argentinensis</i>                | <i>D. argentinensis</i> | Argentina                   | Present study |
| MH682163.1 <i>Zearaja chilensis</i> vOMNZ:VT3316 (NADH2)       | <i>Z. chilensis</i>     | Falkland Islands (Malvinas) | [49]          |
| JQ518904.1 <i>Zearaja chilensis</i> GN6416 (NADH2)             | <i>Z. chilensis</i>     | Chile                       | [6]           |
| MK613965.1 <i>Dipturus chilensis</i> isolate CHL-172 NADH2     | <i>Z. chilensis</i>     | Chile                       | [5]           |
| MK613964.1 <i>Dipturus chilensis</i> isolate CHL-171 NADH2     | <i>Z. chilensis</i>     | Chile                       | [5]           |
| MK613963.1 <i>Dipturus chilensis</i> isolate CHL-170 NADH2     | <i>Z. chilensis</i>     | Chile                       | [5]           |
| MK613962.1 <i>Dipturus chilensis</i> isolate CHL-104 NADH2     | <i>Z. chilensis</i>     | Chile                       | [5]           |
| MK613958.1 <i>Dipturus chilensis</i> isolate CHL-89 NADH2      | <i>Z. chilensis</i>     | Chile                       | [5]           |
| MK613955.1 <i>Dipturus chilensis</i> isolate CHL-88 NADH2      | <i>Z. chilensis</i>     | Chile                       | [5]           |
| MK613957.1 <i>Dipturus chilensis</i> isolate CHL-79 NADH2      | <i>Z. chilensis</i>     | Chile                       | [5]           |
| KJ913073.2 <i>Zearaja chilensis</i> v Zch001 mit compl genome  | <i>Z. chilensis</i>     | Chile                       | [44]          |
| MK613961.1 <i>Dipturus chilensis</i> isolate CHL-98 NADH2      | <i>Z. chilensis</i>     | Chile                       | [5]           |
| MK613960.1 <i>Dipturus chilensis</i> isolate CHL-97 NADH2      | <i>Z. chilensis</i>     | Chile                       | [5]           |
| MK613959.1 <i>Dipturus chilensis</i> isolate CHL-90 NADH2      | <i>Z. chilensis</i>     | Chile                       | [5]           |
| MK613956.1 <i>Dipturus chilensis</i> isolate CHL-76 NADH2      | <i>Z. chilensis</i>     | Chile                       | [5]           |
| MK613976.1 <i>Dipturus nasutus</i> isolate ZN-6 NADH2          | <i>Z. nasuta</i>        | New Zealand                 | [5]           |
| MK613974.1 <i>Dipturus nasutus</i> isolate ZN-1 NADH2          | <i>Z. nasuta</i>        | New Zealand                 | [5]           |
| MH682164.1 <i>Zearaja nasuta</i> v OMNZ:VT3305 (NADH2)         | <i>Z. nasuta</i>        | New Zealand                 | [49]          |
| MK613975.1 <i>Dipturus nasutus</i> isolate ZN-5 NADH2          | <i>Z. nasuta</i>        | New Zealand                 | [5]           |
| NC037961.1 <i>Zearaja nasuta</i> v eFish-1065 mit compl genome | <i>Z. nasuta</i>        | New Zealand                 | [46]          |

|                                                                |                          |             |      |
|----------------------------------------------------------------|--------------------------|-------------|------|
| MF278960.1 <i>Zearaja nasuta</i> v eFish-1065 mit compl genome | <i>Z. nasuta</i>         | New Zealand | [46] |
| JQ518903.1 <i>Zearaja nasuta</i> bio-material GN2708 (NADH2)   | <i>Z. nasuta</i>         | New Zealand | [6]  |
| KF927820.1 <i>Dipturus kwangtungensis</i>                      | <i>D. kwangtungensis</i> | Taiwan      | [50] |

---

49. Beer, A.; Ingram, T.; Randhawa, H.S. Role of ecology and phylogeny in determining tapeworm assemblages in skates (Rajiformes). *J. Helminthol.* **2019**, *93*, 738–751.
50. Straube, N.; White, W.T.; Ho, H.-C.; Rochel, E.; Corrigan, S.; Li, C.; Naylor, G.J.P. A DNA sequence-bases identification checklist for Taiwanese chondrichthyans. *Zootaxa* **2013**, *3752*, 256–278.

Table S3. Variable sites resulting from the multiple alignment among *COI* sequences, showing the different haplotypes obtained in this study. Grey shading indicates haplotypes grouping.

[illegible]

|                                                         |     |                  |                                                                         |
|---------------------------------------------------------|-----|------------------|-------------------------------------------------------------------------|
| FARG018-06 Zearaja brevicaudata                         | HB4 | Z. brevicaudata  | . . . . C . . . . . - -                                                 |
| FARG015-06 Zearaja brevicaudata                         | HB4 | Z. brevicaudata  | . . . . C . . . . . - -                                                 |
| EH0312-3 Zearaja flavirostris KY356824.1                | HB4 | Z. flavirostris  | . . . . C . . . . . C -                                                 |
| EH0312-1 Zearaja flavirostris KY356822.1                | HB4 | Z. flavirostris  | . . . . C . . . . . - -                                                 |
| EH0413-1 Zearaja flavirostris KY356837.1                | HB5 | Z. flavirostris  | . . . . . A . . . . . - -                                               |
| EH0312-2 Zearaja flavirostris KY356823.1                | HB5 | Z. flavirostris  | . . . . . A . . . . . C -                                               |
| EH0312-6 Zearaja flavirostris KY356827.1                | HB6 | Z. flavirostris  | . . . . . G . . . . . C -                                               |
| Zchil-1 Zearaja brevicaudata                            | HB7 | Z. brevicaudata  | . . . . . T . . . . .                                                   |
| FARG338-07 Zearaja brevicaudata                         | HB8 | Z. brevicaudata  | . . . . . T G . . . . . - -                                             |
| EH0413-7 Zearaja flavirostris KY356834.1                | HB8 | Z. flavirostris  | . . . . . T G . . . . . C -                                             |
| KR152643.1 Dipturus trachyderma mit.<br>Compl. Genome   | HT1 | D. trachyderma   | C . . T . G . . . . A G . . C G T . G . . . . G A . T G A C C G G C . C |
| VicI Dipturus trachyderma                               | HT1 | D. trachyderma   | C . . T . G . . . . A G . . C G T . G . . . . G A . T G A C C G G C . . |
| EH0117 L6 Dipturus trachyderma                          | HT1 | D. trachyderma   | C . . T . G . . . . A G . . C G T . G . . . . G A . T G A C C G G C . . |
| KF962934.1 Dipturus argentinensis mit.<br>Compl. genome | HT1 | D. argentinensis | C . . T . G . . . . A G . . C G T . G . . . . G A . T G A C C G G C . C |
| EU074405.1 Dipturus argentinensis                       | HT1 | D. argentinensis | C . . T . G . . . . A G . . C G T . G . . . . G A . T G A C C G G C - - |
| FARG019-06                                              | HT1 | D. argentinensis | C . . T . G . . . . A G . . C G T . G . . . . G A . T G A C C G G C - - |
| EU074406.1 Dipturus argentinensis                       | HT1 | D. argentinensis | C . . T . G . . . . A G . . C G T . G . . . . G A . T G A C C G G C - - |
| FARG320-07                                              | HT1 | D. argentinensis | C . . T . G . . . . A G . . C G T . G . . . . G A . T G A C C G G C - - |
| EU074409.1 Dipturus argentinensis                       | HT1 | D. argentinensis | C . . T . G . . . . A G . . C G T . G . . . . G A . T G A C C G G C - - |
| FARG020-06                                              | HT1 | D. argentinensis | C . . T . G . . . . A G . . C G T . G . . . . G A . T G A C C G G C - - |
| KU737841.1 Dipturus argentinensis<br>SWFSC:DCG1         | HT1 | D. argentinensis | C . . T . G . . . . A G . . C G T . G . . . . G A . T G A C C G G C - - |
| MK982884.1 Dipturus argentinensis DIPSP-<br>02-2017     | HT1 | D. argentinensis | C . . T . G . . . . A G . . C G T . G . . . . G A . T G A C C G G C A - |
| EH0117 L3-1 Dipturus argentinensis                      | HT1 | D. argentinensis | C . . T . G . . . . A G . . C G T . G . . . . G A . T G A C C G G C . . |
| EH0117 L6-2 Dipturus argentinensis                      | HT1 | D. argentinensis | C . . T . G . . . . A G . . C G T . G . . . . G A . T G A C C G G C . . |
| EH0117 L13-3 Dipturus argentinensis                     | HT1 | D. argentinensis | C . . T . G . . . . A G . . C G T . G . . . . G A . T G A C C G G C . . |



|                                                         |     |                         |                                                                         |
|---------------------------------------------------------|-----|-------------------------|-------------------------------------------------------------------------|
| EH0113 L9 <i>Dipturus argentinensis</i>                 | HT1 | <i>D. argentinensis</i> | C . . T . G . . . . A G . . C G T . G . . . . G A . T G A C C G G C . . |
| EH0113 L13 <i>Dipturus argentinensis</i>                | HT2 | <i>D. argentinensis</i> | C . . T . G . . . . . G . . C G T . G . . . . G A . T G A C C G G C . . |
| FNZ127-06 <i>Zearaja nasuta</i> COI-5P                  | HN1 | <i>Z. nasutus</i>       | C A . T . G . . T A . G T . . G T C G . G . . G A . . G A . C C G C - - |
| FNZ413-06 <i>Zearaja nasuta</i> COI-5P                  | HN1 | <i>Z. nasutus</i>       | C A . T . G . . T A . G T . . G T C G . G . . G A . . G A . C . G C - - |
| FNZ415-06 <i>Zearaja nasuta</i> COI-5P                  | HN1 | <i>Z. nasutus</i>       | C A . T . G . . T A . G T . . G T C G . G . . G A . . G A . C . G C - - |
| FNZA617-08 <i>Zearaja nasuta</i> COI-5P                 | HN1 | <i>Z. nasutus</i>       | C A . T . G . . T A . G T . . G T C G . G . . G A . . G A . C . G C - - |
| FNZA619-08 <i>Zearaja nasuta</i> COI-5P                 | HN1 | <i>Z. nasutus</i>       | C A . T . G . . T A . G T . . G T C G . G . . G A . . G A . C . G C - - |
| GBMNA14225-19 <i>Zearaja nasuta</i><br>MF278960         | HN1 | <i>Z. nasutus</i>       | C A . T . G . . T A . G T . . G T C G . G . . G A . . G A . C . G C . C |
| GBMNA18583-19 <i>Zearaja nasuta</i> NC<br>037961        | HN1 | <i>Z. nasutus</i>       | C A . T . G . . T A . G T . . G T C G . G . . G A . . G A . C . G C . C |
| NC 037961.1 <i>Zearaja nasuta</i> mit. Compl.<br>genome | HN1 | <i>Z. nasutus</i>       | C A . T . G . . T A . G T . . G T C G . G . . G A . . G A . C . G C . C |
| MF278960.1 <i>Zearaja nasuta</i> mit. Compl.<br>genome  | HN1 | <i>Z. nasutus</i>       | C A . T . G . . T A . G T . . G T C G . G . . G A . . G A . C . G C . C |
| FNZ417-06 <i>Zearaja nasuta</i> COI-5P                  | HN2 | <i>Z. nasutus</i>       | C A A T . G . . T A . G T . . G T C G . . . . G A . . G A . C . G C - - |
| IRREK464-08 <i>Zearaja nasuta</i> COI-5P                | HN2 | <i>Z. nasutus</i>       | C A A T . G . . T A . G T . . G T C G . . . . G A . . G A . C . G C - - |
| FNZ322-06 <i>Zearaja nasuta</i> COI-5P                  | HN3 | <i>Z. nasutus</i>       | C A . T . G . . T A . G T . . G T C G . . . . G A . . G A . C . G C - - |
| JN602438.1 <i>Zearaja nasuta</i>                        | HN4 | <i>Z. nasutus</i>       | - - - T . G . . . A . G T . . G T C G . G . . G A . . G A . C . G C - - |
| FNZA616-08 <i>Zearaja nasuta</i> COI-5P                 | HN5 | <i>Z. nasutus</i>       | C A . T . G . G T A . G T . . G T C G . G . . G A . . G A . C . G C - - |
| KJ913073 <i>Zearaja chilensis</i>                       | HC1 | <i>Z. chilensis</i>     | C . . T . G . . T A . G T . . G T C G . . C . G A C . G A . C G G C - - |
| FCHIL126-06 <i>Zearaja chilensis</i>                    | HC1 | <i>Z. chilensis</i>     | C . . T . G . . T A . G T . . G T C G . . C . G A C . G A . C G G C - - |
| FCHIL139-06 <i>Zearaja chilensis</i>                    | HC1 | <i>Z. chilensis</i>     | C . . T . G . . T A . G T . . G T C G . . C . G A C . G A . C G G . - - |
| FCHIL136-06 <i>Zearaja chilensis</i>                    | HC1 | <i>Z. chilensis</i>     | C . . T . G . . T A . G T . . G T C G . . C . G A C . G A . C G G . - - |
| FCHIL135-06 <i>Zearaja chilensis</i>                    | HC1 | <i>Z. chilensis</i>     | C . . T . G . . T A . G T . . G T C G . . C . G A C . G A . C G G . - - |
| FCHIL133-06 <i>Zearaja chilensis</i>                    | HC1 | <i>Z. chilensis</i>     | C . . T . G . . T A . G T . . G T C G . . C . G A C . G A . C G G C - - |
| FCHIL130-06 <i>Zearaja chilensis</i>                    | HC1 | <i>Z. chilensis</i>     | C . . T . G . . T A . G T . . G T C G . . C . G A C . G A . C G G C - - |
| FCHIL129-06 <i>Zearaja chilensis</i>                    | HC1 | <i>Z. chilensis</i>     | C . . T . G . . T A . G T . . G T C G . . C . G A C . G A . C G G C - - |
| FCHIL128-06 <i>Zearaja chilensis</i>                    | HC1 | <i>Z. chilensis</i>     | C . . T . G . . T A . G T . . G T C G . . C . G A C . G A . C G G . - - |
| FCHIL127-06 <i>Zearaja chilensis</i>                    | HC1 | <i>Z. chilensis</i>     | C . . T . G . . T A . G T . . G T C G . . C . G A C . G A . C G G C - - |



Table S4. Variable sites resulting from the multiple alignment among *NADH2* sequences, showing the different haplotypes obtained in this study.

| NADH2 Sequence                                   | Haplotype | Original classification | 2 | 2 | 3 | 3 | 3 | 3 | 3 | 3 | 3 | 3 | 3 | 3 | 3 | 3 | 4 | 4 | 4 | 4 | 5 | 5 | 5 | 5 | 5 | 5 |
|--------------------------------------------------|-----------|-------------------------|---|---|---|---|---|---|---|---|---|---|---|---|---|---|---|---|---|---|---|---|---|---|---|---|
|                                                  |           |                         | 9 | 9 | 0 | 1 | 2 | 3 | 4 | 4 | 5 | 5 | 5 | 8 | 9 | 9 | 0 | 6 | 8 | 8 | 1 | 2 | 2 | 4 | 6 | 8 |
|                                                  |           |                         | 2 | 4 | 6 | 6 | 1 | 3 | 5 | 8 | 1 | 4 | 7 | 6 | 1 | 9 | 5 | 2 | 3 | 6 | 7 | 5 | 9 | 6 | 5 | 2 |
| EH0113 L9 NADH2 <i>Dipturus argentinensis</i>    | HT1       | <i>D. argentinensis</i> | A | G | T | T | C | A | C | G | A | C | C | A | T | A | G | T | T | C | A | A | G | G | G | C |
| EH0118 NADH2 <i>Dipturus trachyderma</i>         | HT2       | <i>D. trachyderma</i>   | . | . | C | C | . | . | . | . | . | . | . | . | . | . | . | . | . | . | . | . | . | . | . | . |
| EH0117 L6-2 NADH2 <i>Dipturus argentinensis</i>  | HT2       | <i>D. argentinensis</i> | . | . | C | C | . | . | . | . | . | . | . | . | . | . | . | . | . | . | . | . | . | . | . | . |
| EH0117 L6 NADH2 <i>Dipturus trachyderma</i>      | HT2       | <i>D. trachyderma</i>   | . | . | C | C | . | . | . | . | . | . | . | . | . | . | . | . | . | . | . | . | . | . | . | . |
| EH0113 L13 NADH2 <i>Dipturus argentinensis</i>   | HT2       | <i>D. argentinensis</i> | . | . | C | C | . | . | . | . | . | . | . | . | . | . | . | . | . | . | . | . | . | . | . | . |
| EH0117 L3-1 NADH2 <i>Dipturus argentinensis</i>  | HT2       | <i>D. argentinensis</i> | . | . | C | C | . | . | . | . | . | . | . | . | . | . | . | . | . | . | . | . | . | . | . | . |
| EH0117 L13-3 NADH2 <i>Dipturus argentinensis</i> | HT2       | <i>D. argentinensis</i> | . | . | C | C | . | . | . | . | . | . | . | . | . | . | . | . | . | . | . | . | . | . | . | . |
| DT7 16 NADH2 <i>Dipturus trachyderma</i>         | HT2       | <i>D. trachyderma</i>   | . | . | C | C | . | . | . | . | . | . | . | . | . | . | . | . | . | . | . | . | . | . | . | . |
| VicI NADH2 <i>Dipturus trachyderma</i>           | HT2       | <i>D. trachyderma</i>   | . | . | C | C | . | . | . | . | . | . | . | . | . | . | . | . | . | . | . | . | . | . | . | . |
| JQ518866.1 <i>D leptocauda</i> bio-mat           |           |                         |   |   |   |   |   |   |   |   |   |   |   |   |   |   |   |   |   |   |   |   |   |   |   |   |
| GN2397(NADH2)                                    | HT2       | <i>D. leptocaudus</i>   | . | . | C | C | . | . | . | . | . | . | . | . | . | . | . | . | . | . | . | . | . | . | . | . |
| KR152643.1 <i>Dipturus trachyderma</i>           | HT2       | <i>D. trachyderma</i>   | . | . | C | C | . | . | . | . | . | . | . | . | . | . | . | . | . | . | . | . | . | . | . | . |
| KF962934.1 <i>Dipturus argentinensis</i>         | HT2       | <i>D. argentinensis</i> | . | . | C | C | . | . | . | . | . | . | . | . | . | . | . | . | . | . | . | . | . | . | . | . |
| JQ400131.1 <i>Dipturus trachyderma</i>           | HT2       | <i>D. trachyderma</i>   | . | . | C | C | . | . | . | . | . | . | . | . | . | . | . | . | . | . | . | . | . | . | . | . |
| EH0312 2 NADH2 <i>Zearaja flavirostris</i>       | HB3       | <i>Z. flavirostris</i>  | . | A | C | C | T | . | T | A | . | T | T | . | C | G | A | . | C | T | G | G | A | A | . | . |
| EH0312-3 NADH2 <i>Zearaja flavirostris</i>       | HB4       | <i>Z. flavirostris</i>  | . | A | C | C | T | G | T | C | . | T | T | . | C | G | . | . | C | T | . | G | A | A | . | . |
| EH0413- 8 NADH2 <i>Zearaja flavirostris</i>      | HB4       | <i>Z. flavirostris</i>  | . | A | C | C | T | G | T | C | . | T | T | . | C | G | . | . | C | T | . | G | A | A | . | . |
| EH0111-227 NADH2 <i>Zearaja flavirostris</i>     | HB4       | <i>Z. flavirostris</i>  | . | A | C | C | T | G | T | C | . | T | T | . | C | G | . | . | C | T | . | G | A | A | . | . |
| EH0312-1 NADH2 <i>Zearaja flavirostris</i>       | HB4       | <i>Z. flavirostris</i>  | . | A | C | C | T | G | T | C | . | T | T | . | C | G | . | . | C | T | . | G | A | A | . | . |
| EH0312-4 NADH2 <i>Zearaja flavirostris</i>       | HB5       | <i>Z. flavirostris</i>  | . | A | C | C | T | . | T | C | . | T | T | . | C | G | A | . | C | T | . | G | A | A | . | . |
| EH0312-5 NADH2 <i>Zearaja flavirostris</i>       | HB5       | <i>Z. flavirostris</i>  | . | A | C | C | T | . | T | C | . | T | T | . | C | G | A | . | C | T | . | G | A | A | . | . |
| EH0413-1 NADH2 <i>Zearaja flavirostris</i>       | HB5       | <i>Z. flavirostris</i>  | . | A | C | C | T | . | T | C | . | T | T | . | C | G | A | . | C | T | . | G | A | A | . | . |
| EH0413-2 NADH2 <i>Zearaja flavirostris</i>       | HB5       | <i>Z. flavirostris</i>  | . | A | C | C | T | . | T | C | . | T | T | . | C | G | A | . | C | T | . | G | A | A | . | . |
| EH0413-5 NADH2 <i>Zearaja flavirostris</i>       | HB5       | <i>Z. flavirostris</i>  | . | A | C | C | T | . | T | C | . | T | T | . | C | G | A | . | C | T | . | G | A | A | . | . |
| EH0413-6 NADH2 <i>Zearaja flavirostris</i>       | HB5       | <i>Z. flavirostris</i>  | . | A | C | C | T | . | T | C | . | T | T | . | C | G | A | . | C | T | . | G | A | A | . | . |
| EH0413-9 NADH2 <i>Zearaja flavirostris</i>       | HB5       | <i>Z. flavirostris</i>  | . | A | C | C | T | . | T | C | . | T | T | . | C | G | A | . | C | T | . | G | A | A | . | . |

|                                                               |     |                        |                                                 |
|---------------------------------------------------------------|-----|------------------------|-------------------------------------------------|
| EH0413-10 NADH2 <i>Zearaja flavirostris</i>                   | HB5 | <i>Z. flavirostris</i> | . A C C T . T C . T T . C G A . C T . G A A . . |
| EH0413-4 NADH2 <i>Zearaja flavirostris</i>                    | HB5 | <i>Z. flavirostris</i> | . A C C T . T C . T T . C G A . C T . G A A . . |
| EH0111-222 NADH2 <i>Zearaja flavirostris</i>                  | HB5 | <i>Z. flavirostris</i> | . A C C T . T C . T T . C G A . C T . G A A . . |
| MK613973.1 <i>Dipturus lamillai</i> FA-10 NADH2               | HB5 | <i>D. lamillai</i>     | . A C C T . T C . T T . C G A . C T . G A A . . |
| MK613972.1 <i>Dipturus lamillai</i> FA-9 NADH2                | HB5 | <i>D. lamillai</i>     | . A C C T . T C . T T . C G A . C T . G A A . . |
| MK613971.1 <i>Dipturus lamillai</i> FA-8 NADH2                | HB5 | <i>D. lamillai</i>     | . A C C T . T C . T T . C G A . C T . G A A . . |
| MK613970.1 <i>Dipturus lamillai</i> FA-3 NADH2                | HB5 | <i>D. lamillai</i>     | . A C C T . T C . T T . C G A . C T . G A A . . |
| MK613969.1 <i>Dipturus lamillai</i> FA-1 NADH2                | HB5 | <i>D. lamillai</i>     | . A C C T . T C . T T . C G A . C T . G A A . . |
| MK613966.1 <i>Dipturus lamillai</i> FA-46 NADH2               | HB5 | <i>D. lamillai</i>     | . A C C T . T C . T T . C G A . C T . G A A . . |
| KF648508.1 <i>Zearaja chilensis</i> mit compl genome          | HB5 | KF648508.1             | . A C C T . T C . T T . C G A . C T . G A A . . |
| JQ518902.1 <i>Dipturus flavirostris</i> GN2361NADH2           | HB5 | <i>Z. flavirostris</i> | . A C C T . T C . T T . C G A . C T . G A A . . |
| EH0312-6 NADH2 <i>Zearaja flavirostris</i>                    | HB6 | <i>Z. flavirostris</i> | T A C C T . T A C T T . C G A . C T G G A A A . |
| EH0413-7 NADH2 <i>Zearaja flavirostris</i>                    | HB7 | <i>Z. flavirostris</i> | . A C C . . T C . T T . C G . . C T . G A A . . |
| MH682163.1 <i>Zearaja chilensis</i> vOMNZ:VT3316              | HC8 | <i>Z. chilensis</i>    | . A C C T . T T . . T . . G . . . . G A . . .   |
| JQ518904.1 <i>Zearaja chilensis</i> GN6416                    | HC8 | <i>Z. chilensis</i>    | . A C C T . T T . . T . . G . . . . G A . . .   |
| MK613965.1 <i>Dipturus chilensis</i> CHL-172 NADH2            | HC8 | <i>Z. chilensis</i>    | . A C C T . T T . . T . . G . . . . G A . . .   |
| MK613964.1 <i>Dipturus chilensis</i> CHL-171 NADH2            | HC8 | <i>Z. chilensis</i>    | . A C C T . T T . . T . . G . . . . G A . . .   |
| MK613963.1 <i>Dipturus chilensis</i> CHL-170 NADH2            | HC8 | <i>Z. chilensis</i>    | . A C C T . T T . . T . . G . . . . G A . . .   |
| MK613962.1 <i>Dipturus chilensis</i> CHL-104 NADH2            | HC8 | <i>Z. chilensis</i>    | . A C C T . T T . . T . . G . . . . G A . . .   |
| MK613961.1 <i>Dipturus chilensis</i> CHL-98 NADH2             | HC8 | <i>Z. chilensis</i>    | . A C C T . T T . . T . . G . . . . G A . . .   |
| MK613960.1 <i>Dipturus chilensis</i> CHL-97 NADH2             | HC8 | <i>Z. chilensis</i>    | . A C C T . T T . . T . . G . . . . G A . . .   |
| MK613959.1 <i>Dipturus chilensis</i> CHL-90 NADH2             | HC8 | <i>Z. chilensis</i>    | . A C C T . T T . . T . . G . . . . G A . . .   |
| MK613958.1 <i>Dipturus chilensis</i> CHL-89 NADH2             | HC8 | <i>Z. chilensis</i>    | . A C C T . T T . . T . . G . . . . G A . . .   |
| MK613956.1 <i>Dipturus chilensis</i> CHL-76 NADH2             | HC8 | <i>Z. chilensis</i>    | . A C C T . T T . . T . . G . . . . G A . . .   |
| MK613955.1 <i>Dipturus chilensis</i> CHL-88 NADH2             | HC8 | <i>Z. chilensis</i>    | . A C C T . T T . . T . . G . . . . G A . . .   |
| KJ913073.2 <i>Zearaja chilensis</i> v Zch001 mit compl genome | HC8 | <i>Z. chilensis</i>    | . A C C T . T T . . T . . G . . . . G A . . .   |
| MK613968.1 <i>Dipturus lamillai</i> FA-47 NADH2               | HB9 | <i>D. lamillai</i>     | . A C C T G T C . T T C C G . . C T . G A A . . |

|                                                    |      |                     |                                                 |
|----------------------------------------------------|------|---------------------|-------------------------------------------------|
| MK613967.1 <i>Dipturus lamillai</i> FA-39 NADH2    | HB10 | <i>D. lamillai</i>  | . A C C T . T C . T T . C G A C C T . G A A . . |
| MK613976.1 <i>Dipturus nasutus</i> ZN-6 NADH2      | HN11 | <i>Z. nasuta</i>    | . A C C T . T T . . T . . . . . G A . . .       |
| MK613975.1 <i>Dipturus nasutus</i> ZN-5 NADH2      | HN11 | <i>Z. nasuta</i>    | . A C C T . T T . . T . . . . . G A . . .       |
| MK613974.1 <i>Dipturus nasutus</i> ZN-1 NADH2      | HN11 | <i>Z. nasuta</i>    | . A C C T . T T . . T . . . . . G A . . .       |
| NC 037961.1 <i>Zearaja nasuta</i> mit compl genome | HN11 | <i>Z. nasuta</i>    | . A C C T . T T . . T . . . . . G A . . .       |
| MF278960.1 <i>Zearaja nasuta</i> mit compl genome  | HN11 | <i>Z. nasuta</i>    | . A C C T . T T . . T . . . . . G A . . .       |
| MH682164.1 <i>Zearaja nasuta</i> v OMNZ:VT3305     | HN11 | <i>Z. nasuta</i>    | . A C C T . T T . . T . . . . . G A . . .       |
| JQ518903.1 <i>Zearaja nasuta</i> GN2708            | HN11 | <i>Z. nasuta</i>    | . A C C T . T T . . T . . . . . G A . . .       |
| MK613957.1 <i>Dipturus chilensis</i> CHL-79 NADH2  | HC12 | <i>Z. chilensis</i> | . A C C T . T T . . T . . G . . . . G A . . T   |
